1 **TITLE**

2 Deep vascular imaging in the eye with flow-enhanced ultrasound

3

4 **AUTHORS AND AFFILIATIONS**

5 Christian Damsgaard<sup>1,2</sup> & Henrik Lauridsen<sup>3,\*</sup>

6

7 <sup>1</sup>Aarhus Institute of Advanced Studies, Aarhus University, Høegh Guldbergsgade 6B, 8000 Aarhus  
8 C, Denmark

9 <sup>2</sup>Zoophysiology, Department of Biology, Aarhus University, C. F. Møllers Alle 3, 8000 Aarhus C,  
10 Denmark

11 <sup>3</sup>Department of Clinical Medicine, Aarhus University, Palle Juul-Jensens Boulevard 99, 8200  
12 Aarhus N, Denmark

13 \*Corresponding author: Henrik Lauridsen, [henrik@clin.au.dk](mailto:henrik@clin.au.dk)

14

15 **SUMMARY**

16 We present a non-invasive ultrasound technique for generating three-dimensional angiographies  
17 in the eye without the use of contrast agents.

18

19 **ABSTRACT**

20 The eye's retina is one of the most energy-demanding tissues in the body and thus requires high  
21 rates of oxygen delivery from a rich blood supply. The capillary lamina of the choroid lines the  
22 outer surface of the retina and is the dominating source of oxygen in most vertebrates, but this  
23 vascular bed is challenging to image with traditional optical techniques due to its position behind  
24 the highly light-absorbing retina. Here we describe a high-frequency ultrasound technique with  
25 flow-enhancement to image deep vascular beds (0.5 – 3 cm) of the eye with a high  
26 spatiotemporal resolution. This non-invasive method works well in species with nucleated red  
27 blood cells (non-mammalian and fetal animal models), and it generates non-invasive three-  
28 dimensional angiographies without the use of contrast agents that is independent of blood flow  
29 angles and with a higher sensitivity than Doppler based ultrasound imaging techniques.

## 30 INTRODUCTION

31 The high metabolism on the vertebrate retina imposes an intrinsic tradeoff between two  
32 contrasting needs; high blood flow rates and a light path devoid of blood vessels. To avoid visual  
33 disturbance of perfusing red blood cells, the retina of all vertebrates receives oxygen and  
34 nutrients via a sheet of capillaries *behind* the photoreceptors, the choriocapillaris<sup>1-3</sup>. However,  
35 this single source of nutrients and oxygen imposes a diffusion limitation to the thickness of the  
36 retina<sup>4,5</sup>, so many visually active species possess a variety of elaborate vascular networks to  
37 provide additional blood supply to this metabolically active organ<sup>6</sup>. These vascular beds include  
38 blood vessels perfusing the internal retinal layers in mammals and some fishes<sup>4,7-10</sup>, blood vessels  
39 on the inner (light-facing) side of the retina found in many fishes, reptiles, and birds<sup>4,11-13</sup>, and  
40 countercurrent vascular arrangements of the fish choroid, the choroid *rete mirabile*, that allows  
41 for the generation of super-atmospheric oxygen partial pressures<sup>14-20</sup>. Despite that these  
42 additional non-choroidal paths for retinal nutrient supply play an essential role in fueling the  
43 metabolic requirements of superior vision<sup>4</sup>, the three-dimensional anatomy of these vascular  
44 structures is poorly understood, limiting our understanding of the morphological evolution of the  
45 vertebrate eye.

46 Traditionally, retinal blood supply has been studied using optical techniques, such as  
47 fundus ophthalmoscopy. This category of techniques provides high-throughput non-destructive  
48 information on non-choroidal blood vessel anatomy in high-resolution<sup>21</sup> and is therefore readily  
49 used in clinical diagnosis of abnormalities in retinal vessel structure<sup>22</sup>. However, the  
50 photoreceptor layer absorbs the transmitted light and limits the depth of view in these optical  
51 techniques, providing reduced information on choroidal structure and function without the use  
52 of contrast agent<sup>21</sup>. Similar depth limitations are experienced in optical coherence tomography  
53 (OCT), which generates high-resolution fundus angiographies using light waves at the technical  
54 expense of depth penetration<sup>23</sup>. Magnetic resonance imaging overcomes the optical limitations  
55 of ophthalmoscopy and OCT and can map vascular layers in the retina, albeit at a low resolution<sup>24</sup>.  
56 Histology and microcomputed tomography ( $\mu$ CT) maintain the high-resolution of the optical  
57 techniques and provide information on whole-eye vascular morphology<sup>4</sup>, but both techniques  
58 require ocular sampling and are therefore not possible in the clinic or in rare or endangered  
59 species. To overcome some of the limitations of established retinal imaging techniques, we here  
60 present an ultrasound protocol on anesthetized animals, where blood movement is mapped *in*  
61 *silico* on a series of equally-spaced two-dimensional ultrasound scans spanning a whole eye by  
62 applying a comparable technique as described previously for embryonic and cardiovascular  
63 imaging<sup>25-27</sup>. This approach allows for the generation of non-invasive three-dimensional deep  
64 ocular angiographies without using a contrast agent and opens up new avenues for mapping  
65 blood flow distribution within the eye across species.

66

## 67 PROTOCOL

68

### 69 1. Anesthesia and ultrasound medium

70

#### 71 1.1. Anesthetize research animal

72

73 **Note:** Type and dose of appropriate anesthesia are highly species-dependent. In general,

74 immersion-based anesthetics such as MS-222 (ethyl 3-aminobenzoate methanesulfonic acid),  
75 benzocaine (ethyl 4-aminobenzoate), and propofol (2,6-diisopropyl phenol) are useful in fish and  
76 amphibians which readily absorbs the anesthetic over gills or skin. A range of dissolved  
77 compounds that can be administered intravenously, intramuscularly, intraperitoneally is  
78 available for amniotes, as are gas-based anesthetics. In our experience, alfaxalon administered  
79 intramuscularly is useful in reptiles and isoflurane administered as gas is useful in birds. We point  
80 to <sup>28-30</sup> for a full overview of available anesthetics across species.

81

82 1.2. Test reflexes in the animal.

83

84 **Note:** The flow-enhanced ultrasound procedure is sensitive to motion noise. Thus the animal  
85 must be completely motionless during the procedure. However, too deep anesthesia can alter  
86 blood flow patterns, so it is advisable to conduct a dose titration in the start-up phase of an  
87 experiment where blood flow in the eye is observed aided by simple B-mode ultrasound as  
88 anesthesia dosage is increased in steps. An optimal level of anesthesia is obtained when the  
89 animal is motionless (except respiration) with normal ocular blood flow patterns.

90

91 1.3. If the type/dose of anesthetic is not permissive for respiratory movements, then ensure  
92 adequate ventilation of the animal, *e.g.*, using an air pump to oxygenate the water for aquatic  
93 species or a ventilator for air-breathing species.

94

95 1.4. Position the animal in a posture that allows direct access from above to the eye.

96

97 **Note:** Depending on species, this can be in either a supine or lateral position. It can be useful to  
98 construct a simple holding device using a small piece of non-reactive metal (*e.g.*, stainless steel)  
99 and loose rubber bands (see Fig. 1).

100

101 1.5. Place appropriate ultrasound medium on the eye of the animal. If scaled eyelids (ultrasound  
102 impermeable) cover the eye, then these should be displaced gently with a cotton swab.

103

104 **Note:** For aquatic species, the best ultrasound medium is clean tank water in which the animal  
105 usually lives. For terrestrial species, a generous amount of ultrasound gel ensures free  
106 movements and imaging of the ultrasound transducer across the entire surface of the eye.

107

## 108 2. 2D and 3D ocular ultrasound image acquisition

109

110 2.1. Position ultrasound transducer medial to the eye in either a dorsal/ventral or rostral/caudal  
111 orientation depending on desired image orientation.

112

113 2.2. In B-mode with maximum depth of field, image the medial and deepest portion of the eye  
114 and make sure that all structures of interest are visible in the image field.

115

116 2.3. Slowly translate the transducer to each side while inspecting the real-time images. Make  
117 sure all structures of interest are visible in the image field; if not, switch to a transducer with a

118 lower frequency and larger depth of field.

119

120 **Note:** In our experience, the following center frequencies allow for the following maximum depth  
121 of field: 21 MHz: 3 cm, 40 MHz: 1.5 cm, 50 MHz: 1 cm. However, these maximum depth of field  
122 values can be markedly lower if the eye contains calcified or other ultrasound impermeable  
123 structures.

124

125 2.4. Adjust image depth, depth offset (distance from the top of the image to structure of  
126 interest), image width, as well as number and position of focal zones to cover the desired region  
127 of interest in all three spatial dimensions.

128

129 **Note:** These image parameter settings usually affect the range of possible temporal resolutions  
130 of the ultrasound acquisition.

131

132 2.5. Set frame rate in the range of 50 – 120 frames  $s^{-1}$ .

133

134 **Note:** The temporal resolution must be adequate to display large pixel intensity variability in  
135 imaged blood vessels, *i.e.*, the temporal resolution must not be too high. On the other hand, to  
136 complete a full 3D recording of the eye in a reasonable time, temporal resolution cannot be too  
137 low. In our experience, a temporal resolution ranging from 50 – 120 frames  $s^{-1}$  is usually adequate  
138 for the flow-enhanced procedure in most species. On some ultrasound systems, this desired  
139 temporal resolution can be obtained by switching between the “general imaging” (high  
140 spatial/low temporal resolution) and “cardiology” (low spatial/high temporal resolution) modes.

141

142 2.6. Adjust 2D gain to a level (~5 dB), so anatomical structures are only just visible in the B-mode  
143 acquisition to increase the signal-to-noise ratio in the subsequent flow-enhanced reconstruction.

144

145 2.7. To acquire a 2D flow-enhanced image at a single slice position, translate the transducer to  
146 this position and continue at step 3.1.

147

148 2.8. To acquire a 3D recording of an entire region of interest, *e.g.*, the retina, translate the  
149 transducer to one extreme of the region of interest.

150

151 **Note:** To determine the exact position of the extreme end of the region of interest, it may be  
152 necessary to increase the 2D gain briefly. After correct transducer placement has been  
153 completed, the 2D gain must be lowered before recording to ensure maximal signal-to-noise ratio  
154 in the subsequent flow-enhanced reconstruction.

155

156 2.9. For each step (slice) in the 3D recording, acquire  $\geq 100$  frames (optimally  $\geq 1000$  frames).

157

158 2.10. Using a micromanipulator or build-in transducer motor, translate the transducer across the  
159 entire region of interest in steps of, *e.g.*, 25 or 50  $\mu\text{m}$  (remember to note the step size) and repeat  
160 the  $\geq 100$  frames acquisition for each step.

161

### 162 3. Flow-enhanced image reconstruction

163

164 3.1. Export recordings into digital imaging and communications in medicine (DICOM) file format  
165 (little endian).

166

167 3.2. To produce a single flow-enhanced image based on a  $\geq 100$  frames ( $T$ ) cine recording,  
168 calculate the standard deviation on pixel level ( $STD(x,y)$ ) using the formula:

$$169 \quad STD(x,y) = \left[ \frac{1}{T} \sum_{t=1}^T ((I_t(x,y) - \bar{I}_t(x,y))^2) \right]^{\frac{1}{2}}$$

170 where  $I_t(x,y)$  is the intensity of the pixel at the  $(x,y)$  pixel coordinate at time  $t$ , and  $\bar{I}_t(x,y)$  is the  
171 arithmetic mean value of  $I$  over time.

172

173 3.3. Repeat step 3.2 for each slice in the 3D recording.

174

175 **Note:** To automate the STD-calculation and image reconstruction process for multiple slices in a  
176 3D recording, this operation can be conducted in batch mode using, *e.g.*, ImageJ and the  
177 supplementary macro script (Supplementary file 1).

178

179 3.4. Combine all reconstructed slices into one image stack.

180

181 3.5. Specify slice thickness from the step size used during acquisition.

182

183 3.6. Save image stack as a 3D TIF file.

184

185 **Note:** Flow-weighted three-dimensional recordings of ocular blood vessels can subsequently be  
186 used to create volume renderings and build digital and physical anatomical models of vascular  
187 structures of the eye. These image processing options are outside the scope of this protocol, and  
188 we instead point to<sup>31-33</sup>.

189

190

### 191 REPRESENTATIVE RESULTS

192 The flow-enhanced ultrasound technique to image vascular beds of the eye can be applied in a  
193 range of species, and we have currently used it in 46 different vertebrate species (Fig. 1, Table  
194 1). The presence of nucleated red blood cells in non-adult-mammalian vertebrates provides  
195 positive contrast of flowing blood compared to static tissue in cine recordings (Supplementary  
196 file 2). However, when analyzed on a frame-by-frame basis, the clear distinction between blood  
197 and surrounding tissue is less obvious (Fig. 2A). The blood flow enhancement procedure  
198 described in this protocol essentially compiles a multi-time point recording in 2D space (a slice  
199 made of  $T$  frames) into a single image in which the inherent signal value fluctuations in pixels  
200 positioned in flowing blood scores a higher standard deviation than surrounding static tissue,  
201 hence producing positive contrast (Fig. 2B). To perceivably enhance the blood vessel contrast,  
202 Look Up Tables can be used to produce pseudocolor images (Fig. 2C). In 3D acquisitions, multiple

203 parallel slices with known spacing can be combined into 3D image data (Supplementary file 3 and  
204 4) that can be used for three-dimensional volume rendering (Fig. 2D) and anatomical modeling  
205 (Fig. 2E and Supplementary file 5). Doppler-based ultrasound imaging also provides the option to  
206 specifically image blood flow, however with less sensitivity than the described method (compare  
207 Fig. 2G with Fig. 2H and 2I), and importantly not if blood flow orientation is directly or close to  
208 perpendicular to the direction of the sound wave. The flow-enhanced procedure described in this  
209 protocol is independent of the orientation of blood flow both in-plane and out-of-plane.  
210 The flow-enhanced ultrasound procedure allows for blood flow imaging in a range of species with  
211 nucleated red blood cells (Fig. 3A - 3D). Deep ocular vascular beds such as the choroid *rete*  
212 *mirabile* in some fish can be imaged if present in the species (yellow arrowhead in Figs. 2, 3B,4).  
213 The method is limited by the absence of nucleated red blood cells in adult mammals in which the  
214 flow enhancement procedure produces some degree of blood flow contrast but not as distinct  
215 as in species with nucleated red blood cells (Fig. 3E and 3F).  
216 Flow-enhanced ultrasound is sensitive to motion noise, and *e.g.*, respiratory movements can  
217 cause image blurring and artifacts such as tissue border enhancement (Fig. 4A – 4C,  
218 Supplementary file 6). Prospective or retrospective gating can be used to adjust for motion noise  
219 (Fig. 4D and 4E).  
220  
221

## 222 FIGURE AND TABLE LEGENDS

223

224 **Figure 1. Examples of the variety of species suitable for flow-enhanced ultrasound imaging of**  
225 **ocular vasculature. A**, goldfish (*Carassius auratus*). **B**, Siberian sturgeon (*Acipenser baerii*). **C**,  
226 European seabass (*Dicentrarchus labrax*). **D**, clown featherback (*Chitala ornata*). **E**, Crucian carp  
227 (*Carassius carassius*). **F**, embryonic domestic chicken (*Gallus gallus domesticus*). It can be useful  
228 to construct a simple holding device using a non-reactive metal weight and loose rubber bands  
229 (**A, C, D**). Both large, immobile lab-based ultrasound imaging systems can be used for the  
230 procedure (**A – D, F**) as well as small field operative systems (**E**). When imaging small and highly  
231 temperature-sensitive species that cannot be retained in a temperature-controlled water bath  
232 like embryonic birds, imaging can be performed while the sample is inside the incubator (**F**).

233

234 **Figure 2. Effect of flow-enhancement. A**, Examples of raw B-mode ultrasonographic images of  
235 the eye of a goldfish in a 1000 frame cine recording. Whereas blood flow can be observed in the  
236 cine recording (supplementary material 2) it is difficult to see in static frames. **B**, flow-enhanced  
237 grayscale image (same slice as in **A**). Both retinal and post-retinal vascular beds are enhanced. **C**,  
238 pseudo-colored version of the image in **B** with ImageJ Fire Look Up Table. **D**, volume-rendered  
239 display of blood flow in the eye of the same goldfish as in **A-C**, based on 3D acquisition. **E**, two-  
240 segment (retinal and post-retinal vessels) anatomical model of eye in **A-D** (for interactive model  
241 see supplementary material 5). **F-I**, raw B-mode ultrasonographic image of the eye of another  
242 goldfish (**F**) comparing color Doppler based flow imaging (**G**) to the flow-enhanced methods  
243 described in this protocol (**H-I**, note **I** is an overlay of **H** on **F**). Green arrows indicate retinal  
244 vessels, yellow arrowheads indicate the choroid *rete mirabile*.

245

246 **Figure 3. Representative examples of flow-enhanced ocular ultrasound images in a variety of**  
247 **vertebrate species.**

248 **A**, Senegal bichir (*Polypterus senegalus*). **B**, red-bellied piranha (*Pygocentrus nattereri*). **C**, green  
249 iguana (*Iguana iguana*). **D**, embryonic (day 18) domestic chicken (*Gallus gallus domesticus*). **E**,  
250 House mouse (*Mus musculus*). **F**, brown rat (*Rattus norvegicus*). In species with nucleated red  
251 blood cells, the flow-enhancement procedure yields useful images of ocular blood flow (**A-D**),  
252 whereas in adult mammals (enucleated red blood cells), it produces only limited contrast  
253 between flowing blood and surrounding tissue (**E-F**). Green arrows indicate retinal vessels, blue  
254 arrowheads indicate post-retinal vessels such as the choriocapillaris, yellow arrowheads indicate  
255 choroid *rete mirabile*. In the late embryonic domestic chicken, blood flow in the pecten oculi can  
256 be observed (lower green arrow in **F**).

257

258 **Figure 4. Respiratory movements induce motion noise that can be alleviated by retrospective**  
259 **gating.**

260 **A-B**, Example of respiratory movements in the eye of a European plaice (*Pleuronectes platessa*).  
261 Red dot is at the same image coordinate in **A** (slice 54/410) and **B** (slice 92/410), but it can be  
262 observed that the eye has shifted position (see also cine recording in supplementary material 6).  
263 **C**, attempt to perform flow-enhancement operation on the full 410 frames recording fails due to  
264 motion noise. Tissue borders are artificially enhanced due to movements. **D**, retrospective gating  
265 operation based on normalized signal intensity (SI) at the red dot in **A-B**. Only frames with

266 normalized SI > 50 (in total 38 frames), *i.e.*, indicating that the eye is at the same position as in **B**,  
267 are included for the flow-enhancement procedure. **E**, resulting image of retrospectively gated  
268 flow-enhancement procedure. Compare with **C**. In the gated image, artificial border  
269 enhancement is avoided, and blood flow in the choroid *rete mirabile* (yellow arrowhead) can be  
270 observed.

271

272 **Table 1.** List of species that the flow-enhanced ultrasound technique to image ocular blood flow  
273 has been used on. The applicability of the method is based on the ability to produce contrast rich  
274 representation of vascular beds compared to static background.

275

#### 276 **SUPPLEMENTARY FILES:**

277

278 **Supplementary file 1.** Macro script to automate flow-enhancement calculations. Script is written  
279 in IJ1 Macro language and can be executed both using the ImageJ macro function (for single slice  
280 recording) or the ImageJ Batch Process (for multiple slice 3D recording).

281

282 **Supplementary file 2.** Raw B-mode cine recording on the eye of a goldfish (*Carassius auratus*).  
283 Blood flow can be observed as the video is playing, but not on a single frame as in Fig. 2A.

284

285 **Supplementary file 3.** Slice video through the eye of a goldfish (*Carassius auratus*) of blood flow-  
286 enhanced sections.

287

288 **Supplementary file 4.** Three-dimensional TIF file of flow-enhanced eye of goldfish (*Carassius*  
289 *auratus*). Images have been binned by  $3 \times 3 \times 3$  to minimize file size (27-fold reduction in spatial  
290 resolution and file size).

291

292 **Supplementary file 5.** Interactive 3D model of pre- and post-retinal vessels in the eye of a goldfish  
293 (*Carassius auratus*).

294

295 **Supplementary file 6.** Raw B-mode cine recording on the eye of a European plaice (*Pleuronectes*  
296 *platessa*). Note respiratory movements.

297

298

#### 299 **DISCUSSION**

300 Vascular imaging using flow-enhanced ultrasound provides a new method for non-invasive  
301 imaging of the vasculature of the eye that offers several advantages over present techniques but  
302 has its intrinsic limitations. The primary advantage of flow-enhanced ultrasound is the ability to  
303 generate ocular angiographies with a depth of field that exceeds the photoreceptor layer, which  
304 limits the depth of field in optical techniques. In ultrasound imaging, spatial resolution and depth  
305 of field are ultimately determined by the ultrasound transducer frequency, where higher  
306 frequencies increase the spatial resolution but at the expense of a shallower depth of field, thus  
307 the choice of transducer frequency introduces a tradeoff between image depth and spatial  
308 resolution. In our experience, optimal retinal ultrasound imaging is achieved using high-  
309 frequency ultrasound transducers ( $\geq 50$  MHz) in small eyes with image depths of <1 cm and lower



310 frequency transducers (20-40 MHz) in larger eyes with image depths of 1.5 – 3.0 cm. For a 3D  
311 ultrasound scan, the resolution of the additional slice-dimension is set by the step size between  
312 scans in the stack of 2D ultrasound scans. In our experience, it is difficult to conduct a 3D scan  
313 with a step size smaller than 20  $\mu\text{m}$ .

314 Flow-enhanced 2D ultrasound has a high temporal resolution. Ideally,  $\geq 1000$  frames per  
315 image are required for flow-enhanced vascular imaging, so at least 8 seconds are required per  
316 image scan. The temporal resolution is significantly reduced when performing 3D flow-enhanced  
317 ultrasound, where the scanning time increases with the number of images in the 3D stack of  
318 scans. Given the high temporal resolution, the flow-enhanced 2D ultrasound workflow shows  
319 strong potential as a method for identifying temporal changes in relative blood flow velocities  
320 and blood flow distribution during experimental manipulation. Thus, future studies can use the  
321 workflow to identify how altered environmental temperatures (*e.g.*, temperature,  $p\text{O}_2$ ,  $p\text{CO}_2$ ) or  
322 pharmacological administration affect blood flow in the eye and other organs.

323 The ultrasound workflow relies on the positive contrast of nucleated red blood cells from  
324 most non-mammalian vertebrates. Thus, the enucleated red blood cells of mammals and some  
325 salamander species<sup>34</sup> provide too little contrast to effectively enhance blood flow using the  
326 present workflow (Fig. 3EF). In traditional ultrasound workflows, vascular injection of  
327 microbubbles provides high enough contrast to identify the vasculature in mammals<sup>35</sup>. However,  
328 our initial attempts to generate flow-enhanced angiographies in rodents using vascular  
329 microbubble injection failed, so future implementation of flow-enhanced ultrasound mapping of  
330 mammalian vasculatures relies on the optimization microbubble dosages and ultrasound  
331 settings<sup>35</sup>.

332 Flow-enhanced ultrasound depends on sequential recordings in the same position of the  
333 eye, so the technique is not possible in awake animals, where minor random movements may  
334 offset the image and undermine flow-enhancement calculations. Thus, the present method must  
335 be performed under proper anesthesia for immobilization to enhance image quality by reducing  
336 random movements. However, regular movements of the eye that occur during regular  
337 respiratory movements can be offset by prospectively or retrospectively gating to the ventilation  
338 pattern of the animal, so only scan recording from the same time interval within the ventilation  
339 cycle is used in the data analysis. While the retrospective gating approach to offset ventilatory  
340 movements of the image significantly improves the image stability, it pronouncedly reduces the  
341 number of frames included in calculating standard deviation of signal intensity leading to a  
342 decrease in signal-to-noise ratio (compare Fig. 4E to Fig. 2C and 2I). This effect is alleviated using  
343 prospective gating at the ultrasound scanner in which image data is only acquired when the  
344 animal is in the desired phase of respiration. However, this causes a marked increase in  
345 acquisition time if a desired number of frames  $\geq 1000$  must be acquired.

346 We see multiple applications in zoological and veterinarian research for the flow-  
347 enhanced ultrasound workflow to map the physiology and anatomy of the eye's vasculature. The  
348 vasculature of ray-finned fishes, mammals, and birds are relatively well-described<sup>1,3,4,8,9,12,15,36</sup>,  
349 but this is not the case for non-bony fishes (jaw-less vertebrates and chondrichthyans),  
350 amphibians, and reptiles, that represent their respective earlier diverging sister groups.  
351 Implementing flow-enhanced ultrasound on these poorly understood animal groups and  
352 integrating these data with knowledge on the more well-studies groups will provide fundamental  
353 insight into the evolution of the vasculature of the vertebrate eye. Because the eye's vasculature

354 is similar in closely related species<sup>4</sup>, such detailed information on the ocular vasculature in a  
355 broad range of species will provide a point-of-reference for veterinarians to identify  
356 malformations in the eye's vasculature due to developmental defects, diseases, or physical  
357 injuries. Furthermore, the ability to acquire 2D blood flow information with a high spatiotemporal  
358 resolution provides the means for quantifying pharmacokinetic effects on blood flow distribution  
359 and velocities in deep vascular beds, with vast applications in drug development and testing.  
360 Future studies on this technique should focus on identifying injectable compounds that enhance  
361 the contrast of blood in species with enucleated red blood cells, which will expand the  
362 applicability of this technique to mammals with vast applications in biomedical research and  
363 clinical diagnostics of vascular dysfunction in the eye and other deep vascular beds.

364

#### 365 **ACKNOWLEDGMENTS**

366 This work has received funding from the Carlsberg Foundation (CF17-0778; CF18-0658), the  
367 Lundbeck Foundation (R324-2019-1470; R346-2020-1210), the Velux Foundations (00022458),  
368 The A.P. Møller Foundation for the Advancement of Medical Science, the European Union's  
369 Horizon 2020 research and innovation program under the Marie Skłodowska-Curie grant  
370 agreement (No. 754513), and The Aarhus University Research Foundation.

371

#### 372 **DISCLOSURES**

373 The authors declare that no completing interests exists.

374

#### 375 **REFERENCES**

- 376 1 Yu, C. Q., Schwab, I. R. & Dubielzig, R. R. Feeding the vertebrate retina from the Cambrian  
377 to the Tertiary. *Journal of Zoology*. **278** (4), 259-269, (2009).
- 378 2 Yu, D. Y. & Cringle, S. J. Oxygen distribution and consumption within the retina in  
379 vascularised and avascular retinas and in animal models of retinal disease. *Progress in*  
380 *Retinal and Eye Research*. **20** (2), 175-208, (2001).
- 381 3 Country, M. W. Retinal metabolism: A comparative look at energetics in the retina. *Brain*  
382 *Research*. **1672** 50-57, (2017).
- 383 4 Damsgaard, C. *et al.* Retinal oxygen supply shaped the functional evolution of the  
384 vertebrate eye. *Elife*. **8**, (2019).
- 385 5 Buttery, R. G., Hinrichsen, C. F. L., Weller, W. L. & Haight, J. R. How thick should a retina  
386 be? A comparative study of mammalian species with and without intraretinal vasculature.  
387 *Vision Research*. **31** (2), 169-187, (1991).
- 388 6 Ames, A., Li, Y., Heher, E. & Kimble, C. Energy metabolism of rabbit retina as related to  
389 function: high cost of Na<sup>+</sup> transport. *The Journal of Neuroscience*. **12** (3), 840-853, (1992).
- 390 7 Chase, J. The Evolution of Retinal Vascularization in Mammals: A Comparison of Vascular  
391 and Avascular Retinae. *Ophthalmology*. **89** (12), 1518-1525, (1982).
- 392 8 Johnson, G. L. Ophthalmoscopic studies on the eyes of mammals. *Philosophical*  
393 *Transactions of the Royal Society of London. Series B, Biological Sciences*. **254** (794), 207-  
394 220, (1968).
- 395 9 Johnson, G. L. I. Contributions to the comparative anatomy of the mammalian eye, chiefly  
396 based on ophthalmoscopic examination. *Philosophical Transactions of the Royal Society*  
397 *of London. Series B, Biological Sciences*. **194** (194-206), 1-82, (1901).

- 398 10 Rodriguez-Ramos Fernandez, J. & Dubielzig, R. R. Ocular comparative anatomy of the  
399 family Rodentia. *Veterinary Ophthalmology*. **16** (s1), 94-99, (2013).
- 400 11 Copeland, D. E. Functional vascularization of the teleost eye. *Current Topics in Eye*  
401 *Research*. **3** 219-280, (1980).
- 402 12 Meyer, D. B. in *The Visual System in Vertebrates. Handbook of Sensory Physiology Vol. 7*  
403 (ed F. Crescitelli) (Springer, Berlin, Heidelberg, 1977).
- 404 13 Potier, S., Mitkus, M. & Kelber, A. Visual adaptations of diurnal and nocturnal raptors.  
405 *Semin Cell Dev Biol*. **106** 116-126, (2020).
- 406 14 Wittenberg, J. B. & Wittenberg, B. A. Active secretion of oxygen into the eye of fish.  
407 *Nature*. **194** 106-107, (1962).
- 408 15 Damsgaard, C. Physiology and evolution of oxygen secreting mechanism in the fisheye.  
409 *Comparative Biochemistry and Physiology*. **252A** 110840, (2021).
- 410 16 Damsgaard, C. *et al.* A novel acidification mechanism for greatly enhanced oxygen supply  
411 to the fish retina. *Elife*. **9**, (2020).
- 412 17 Wittenberg, J. B. & Haedrich, R. L. The choroid rete mirabile of the fish eye. II. Distribution  
413 and relation to the pseudobranch and to the swimbladder rete mirabile. *Biological*  
414 *Bulletin*. **146** (1), 137-156, (1974).
- 415 18 Wittenberg, J. B. & Wittenberg, B. A. The choroid rete mirabile of the fish eye. I. Oxygen  
416 secretion and structure: comparison with the swimbladder rete mirabile. *Biological*  
417 *Bulletin*. **146** (1), 116-136, (1974).
- 418 19 Berenbrink, M. Historical reconstructions of evolving physiological complexity: O<sub>2</sub>  
419 secretion in the eye and swimbladder of fishes. *Journal of Experimental Biology*. **210** (Pt  
420 9), 1641-1652, (2007).
- 421 20 Berenbrink, M., Koldkjaer, P., Kepp, O. & Cossins, A. R. Evolution of oxygen secretion in  
422 fishes and the emergence of a complex physiological system. *Science*. **307** (5716), 1752-  
423 1757, (2005).
- 424 21 Keane, P. A. & Sadda, S. R. Retinal Imaging in the Twenty-First Century: State of the Art  
425 and Future Directions. *Ophthalmology*. **121** (12), 2489-2500, (2014).
- 426 22 Yung, M., Klufas, M. A. & Sarraf, D. Clinical applications of fundus autofluorescence in  
427 retinal disease. *International Journal of Retina and Vitreous*. **2** (1), 12, (2016).
- 428 23 Ang, M. *et al.* Optical coherence tomography angiography: a review of current and future  
429 clinical applications. *Graefes Archive for Clinical and Experimental Ophthalmology*. **256**  
430 (2), 237-245, (2018).
- 431 24 Shen, Q. *et al.* Magnetic resonance imaging of tissue and vascular layers in the cat retina.  
432 *Journal of Magnetic Resonance Imaging*. **23** (4), 465-472, (2006).
- 433 25 Tan, G. X., Jamil, M., Tee, N. G., Zhong, L. & Yap, C. H. 3D Reconstruction of Chick Embryo  
434 Vascular Geometries Using Non-invasive High-Frequency Ultrasound for Computational  
435 Fluid Dynamics Studies. *Ann Biomed Eng*. **43** (11), 2780-2793, (2015).
- 436 26 Ho, S., Tan, G. X. Y., Foo, T. J., Phan-Thien, N. & Yap, C. H. Organ Dynamics and Fluid  
437 Dynamics of the HH25 Chick Embryonic Cardiac Ventricle as Revealed by a Novel 4D High-  
438 Frequency Ultrasound Imaging Technique and Computational Flow Simulations. *Annals of*  
439 *Biomedical Engineering*. **45** (10), 2309-2323, (2017).
- 440 27 Dittrich, A., Thygesen, M. M. & Lauridsen, H. 2D and 3D Echocardiography in the Axolotl  
441 (*Ambystoma Mexicanum*). *JoVE*. doi:10.3791/57089 (141), e57089, (2018).

- 442 28 Clarke, K. W., Trim, C. M. & Trim, C. M. *Veterinary Anaesthesia E-Book*. (Elsevier Health  
443 Sciences, 2013).
- 444 29 Flecknell, P. *Laboratory Animal Anaesthesia*. (Elsevier Science & Technology, 2015).
- 445 30 West, G., Heard, D. & Caulkett, N. *Zoo Animal and Wildlife Immobilization and Anesthesia*.  
446 (John Wiley & Sons, Incorporated, 2014).
- 447 31 Lauridsen, H., Hansen, K., Nørgård, M. Ø., Wang, T. & Pedersen, M. From tissue to silicon  
448 to plastic: three-dimensional printing in comparative anatomy and physiology. *Royal*  
449 *Society Open Science*. **3** (3), 150643, (2016).
- 450 32 Lauridsen, H. *et al.* Inside Out: Modern Imaging Techniques to Reveal Animal Anatomy.  
451 *PLoS One*. **6** (3), e17879, (2011).
- 452 33 Ruthensteiner, B. & Heß, M. Embedding 3D models of biological specimens in PDF  
453 publications. *Microscopy Research and Technique*. **71** (11), 778-786, (2008).
- 454 34 Mueller, R. L., Ryan Gregory, T., Gregory, S. M., Hsieh, A. & Boore, J. L. Genome size, cell  
455 size, and the evolution of enucleated erythrocytes in attenuate salamanders. *Zoology*.  
456 **111** (3), 218-230, (2008).
- 457 35 Greis, C. Quantitative evaluation of microvascular blood flow by contrast-enhanced  
458 ultrasound (CEUS). *Clinical Hemorheology and Microcirculation*. **49** 137-149, (2011).
- 459 36 Walls, G. L. *The vertebrate eye and its adaptive radiation*. (Cranbrook Institute of Science,  
460 1944).
- 461

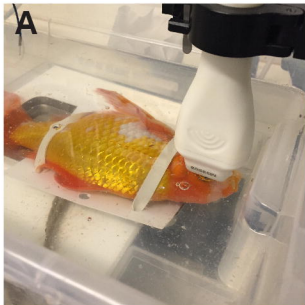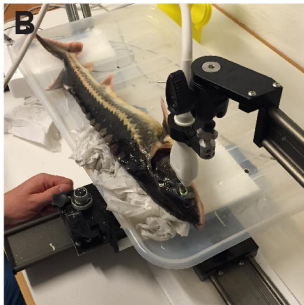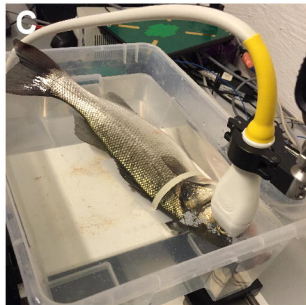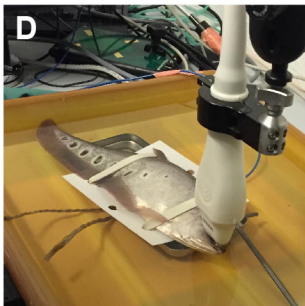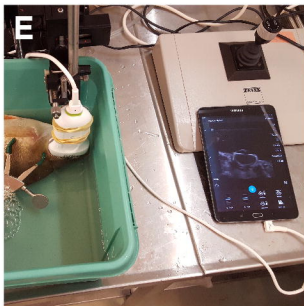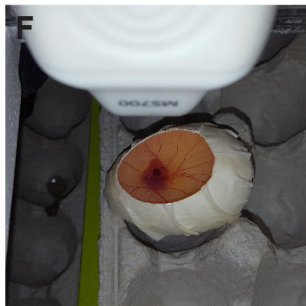

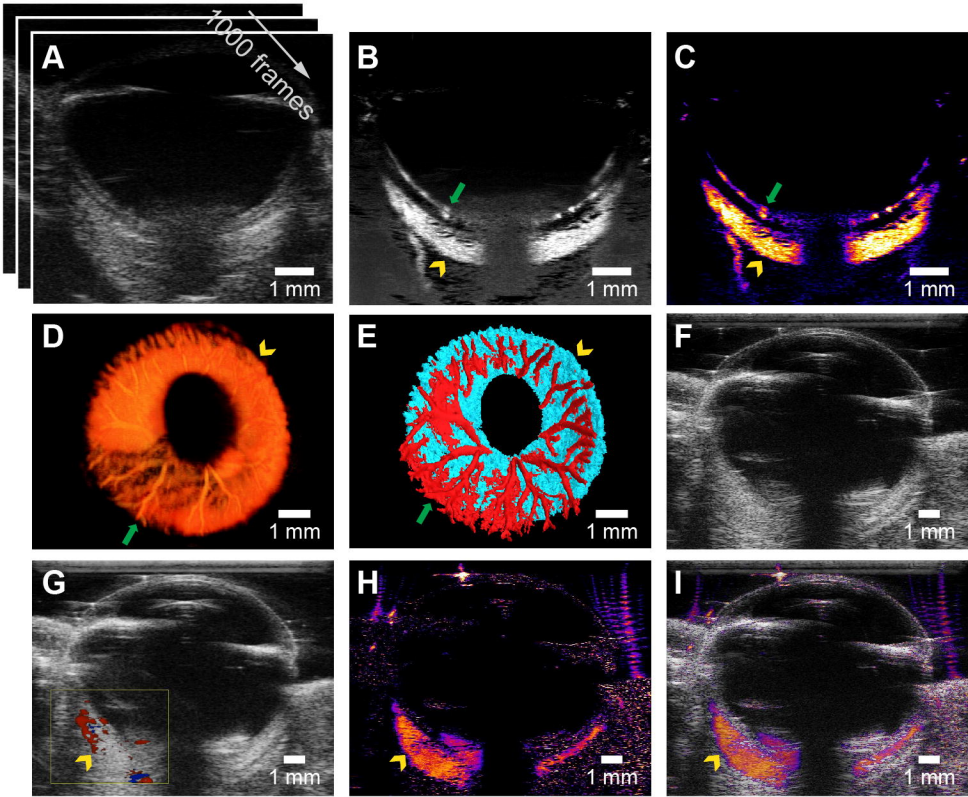

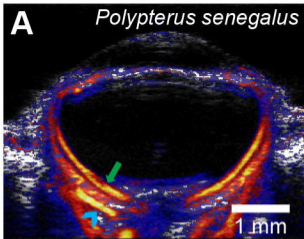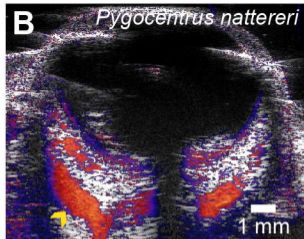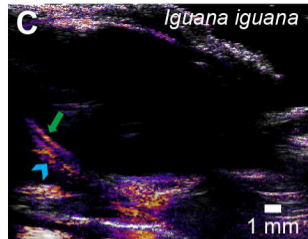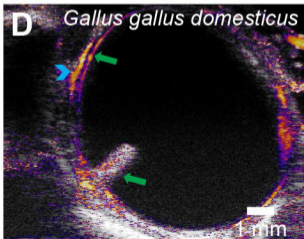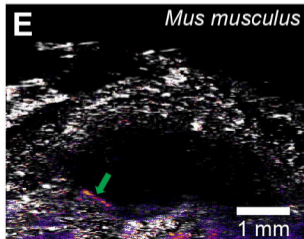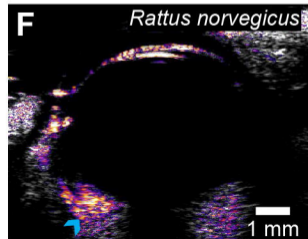

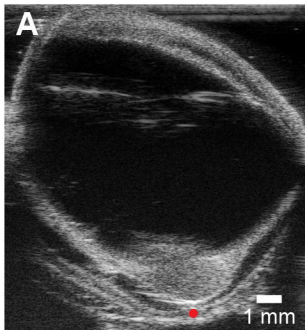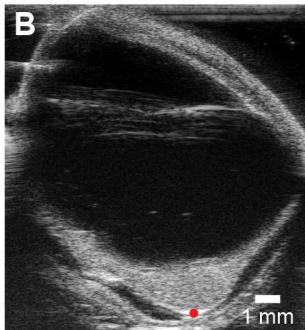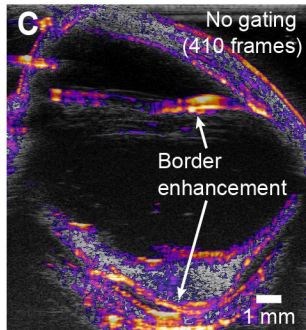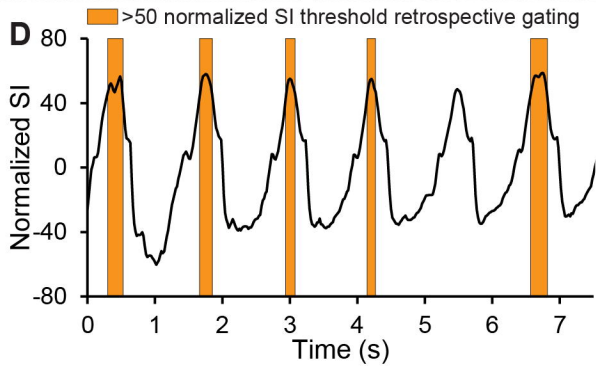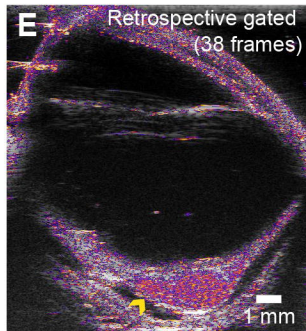

Source: https://www.biorxiv.org/content/10.1101/2021.06.04.447055v1.full.pdf
